# Supplementary material
Source: publisher figshare collection journal article supplement (https://acs.figshare.com/ndownloader/files/4070779)
Supplement: Supplementary file 1 [file 4070779]

 
data_Cytosinium-4-Aminosalicylate
 
_audit_creation_method            SHELXL-97 
_chemical_name_systematic 
; 
 ? 
; 
_chemical_name_common             ? 
_chemical_melting_point           ? 
_chemical_formula_moiety          ? 
_chemical_formula_sum 
 'C11 H12 N4 O4' 
_chemical_formula_weight          264.25 
 
loop_ 
 _atom_type_symbol 
 _atom_type_description 
 _atom_type_scat_dispersion_real 
 _atom_type_scat_dispersion_imag 
 _atom_type_scat_source 
 'C'  'C'   0.0033   0.0016 
 'International Tables Vol C Tables 4.2.6.8 and 6.1.1.4' 
 'H'  'H'   0.0000   0.0000 
 'International Tables Vol C Tables 4.2.6.8 and 6.1.1.4' 
 'N'  'N'   0.0061   0.0033 
 'International Tables Vol C Tables 4.2.6.8 and 6.1.1.4' 
 'O'  'O'   0.0106   0.0060 
 'International Tables Vol C Tables 4.2.6.8 and 6.1.1.4' 
 
_symmetry_cell_setting            'Monoclinic' 
_symmetry_space_group_name_H-M    'P2(1)/c' 
 
loop_ 
 _symmetry_equiv_pos_as_xyz 
 'x, y, z' 
 '-x, y+1/2, -z+1/2' 
 '-x, -y, -z' 
 'x, -y-1/2, z-1/2' 
 
_cell_length_a                    12.6069(17) 
_cell_length_b                    13.6925(18) 
_cell_length_c                    14.595(2) 
_cell_angle_alpha                 90.00 
_cell_angle_beta                  110.973(3) 
_cell_angle_gamma                 90.00 
_cell_volume                      2352.5(5) 
_cell_formula_units_Z             8 
_cell_measurement_temperature     100(2) 
_cell_measurement_reflns_used     1348 
_cell_measurement_theta_min       2.36 
_cell_measurement_theta_max       19.12 
 
_exptl_crystal_description        'plate' 
_exptl_crystal_colour             'colorless'
_exptl_crystal_size_max           0.24 
_exptl_crystal_size_mid           0.20 
_exptl_crystal_size_min           0.12 
_exptl_crystal_density_meas       ? 
_exptl_crystal_density_diffrn     1.492 
_exptl_crystal_density_method     'not measured' 
_exptl_crystal_F_000              1104 
_exptl_absorpt_coefficient_mu     0.116 
_exptl_absorpt_correction_type    'Multi-scan' 
_exptl_absorpt_correction_T_min   0.9694 
_exptl_absorpt_correction_T_max   0.9822 
_exptl_absorpt_process_details    'SADABS' 
 
_exptl_special_details 
; 
 ? 
; 
 
_diffrn_ambient_temperature       100(2) 
_diffrn_radiation_wavelength      0.71073 
_diffrn_radiation_type            MoK\a 
_diffrn_radiation_source          'fine-focus sealed tube' 
_diffrn_radiation_monochromator   graphite 
_diffrn_measurement_device_type   'CCD area detector' 
_diffrn_measurement_method        'phi and omega scans' 
_diffrn_detector_area_resol_mean  ? 
_diffrn_standards_number          ? 
_diffrn_standards_interval_count  ? 
_diffrn_standards_interval_time   ? 
_diffrn_standards_decay_%         ? 
_diffrn_reflns_number             24058 
_diffrn_reflns_av_R_equivalents   0.1186 
_diffrn_reflns_av_sigmaI/netI     0.0933 
_diffrn_reflns_limit_h_min        -15 
_diffrn_reflns_limit_h_max        15 
_diffrn_reflns_limit_k_min        -16 
_diffrn_reflns_limit_k_max        16 
_diffrn_reflns_limit_l_min        -18 
_diffrn_reflns_limit_l_max        18 
_diffrn_reflns_theta_min          1.73 
_diffrn_reflns_theta_max          26.10 
_reflns_number_total              4667 
_reflns_number_gt                 3233 
_reflns_threshold_expression      >2sigma(I) 
 
_computing_data_collection        'Bruker SMART' 
_computing_cell_refinement        'Bruker SMART' 
_computing_data_reduction         'Bruker SAINT' 
_computing_structure_solution     'SHELXS-97 (Sheldrick, 1990)' 
_computing_structure_refinement   'SHELXL-97 (Sheldrick, 1997)' 
_computing_molecular_graphics     'Bruker SHELXTL' 
_computing_publication_material   'Bruker SHELXTL' 
 
_refine_special_details 
; 
 Refinement of F^2^ against ALL reflections.  The weighted R-factor wR and 
 goodness of fit S are based on F^2^, conventional R-factors R are based 
 on F, with F set to zero for negative F^2^. The threshold expression of 
 F^2^ > 2sigma(F^2^) is used only for calculating R-factors(gt) etc. and is 
 not relevant to the choice of reflections for refinement.  R-factors based 
 on F^2^ are statistically about twice as large as those based on F, and R- 
 factors based on ALL data will be even larger. 
; 
 
_refine_ls_structure_factor_coef  Fsqd  
_refine_ls_matrix_type            full 
_refine_ls_weighting_scheme       calc  
_refine_ls_weighting_details 
 'calc w=1/[\s^2^(Fo^2^)+(0.0344P)^2^+1.5667P] where P=(Fo^2^+2Fc^2^)/3' 
_atom_sites_solution_primary      direct 
_atom_sites_solution_secondary    difmap 
_atom_sites_solution_hydrogens    geom 
_refine_ls_hydrogen_treatment     mixed 
_refine_ls_extinction_method      none 
_refine_ls_extinction_coef        ? 
_refine_ls_number_reflns          4667 
_refine_ls_number_parameters      399 
_refine_ls_number_restraints      0 
_refine_ls_R_factor_all           0.1303 
_refine_ls_R_factor_gt            0.0856 
_refine_ls_wR_factor_ref          0.1556 
_refine_ls_wR_factor_gt           0.1405 
_refine_ls_goodness_of_fit_ref    1.142 
_refine_ls_restrained_S_all       1.142 
_refine_ls_shift/su_max           0.000 
_refine_ls_shift/su_mean          0.000 
 
loop_ 
 _atom_site_label 
 _atom_site_type_symbol 
 _atom_site_fract_x 
 _atom_site_fract_y 
 _atom_site_fract_z 
 _atom_site_U_iso_or_equiv 
 _atom_site_adp_type 
 _atom_site_occupancy 
 _atom_site_symmetry_multiplicity 
 _atom_site_calc_flag 
 _atom_site_refinement_flags 
 _atom_site_disorder_assembly 
 _atom_site_disorder_group 
C1 C 0.5899(3) 0.6239(3) 0.9899(3) 0.0211(9) Uani 1 1 d . . . 
C2 C 0.5830(3) 0.6439(2) 0.8890(3) 0.0180(8) Uani 1 1 d . . . 
C3 C 0.6819(3) 0.6514(3) 0.8659(3) 0.0201(8) Uani 1 1 d . . . 
C4 C 0.6768(3) 0.6642(3) 0.7711(3) 0.0221(9) Uani 1 1 d . . . 
H4 H 0.7447 0.6702 0.7575 0.027 Uiso 1 1 calc R . . 
C5 C 0.5722(3) 0.6684(3) 0.6954(3) 0.0213(8) Uani 1 1 d . . . 
C6 C 0.4727(3) 0.6639(3) 0.7166(3) 0.0219(9) Uani 1 1 d . . . 
H6 H 0.4007 0.6695 0.6653 0.026 Uiso 1 1 calc R . . 
C7 C 0.4793(3) 0.6516(3) 0.8110(3) 0.0213(9) Uani 1 1 d . . . 
H7 H 0.4109 0.6481 0.8244 0.026 Uiso 1 1 calc R . . 
C8 C 1.0084(3) 0.0164(3) 0.8845(3) 0.0206(9) Uani 1 1 d . . . 
C9 C 0.9810(3) 0.1207(3) 0.8668(2) 0.0195(8) Uani 1 1 d . . . 
C10 C 1.0595(3) 0.1887(3) 0.8565(3) 0.0222(9) Uani 1 1 d . . . 
C11 C 1.0306(3) 0.2856(3) 0.8385(3) 0.0234(9) Uani 1 1 d . . . 
H11 H 1.0845 0.3306 0.8314 0.028 Uiso 1 1 calc R . . 
C12 C 0.9233(3) 0.3183(3) 0.8307(3) 0.0215(9) Uani 1 1 d . . . 
C13 C 0.8454(3) 0.2514(3) 0.8411(3) 0.0230(9) Uani 1 1 d . . . 
H13 H 0.7718 0.2727 0.8362 0.028 Uiso 1 1 calc R . . 
C14 C 0.8743(3) 0.1550(3) 0.8583(3) 0.0225(9) Uani 1 1 d . . . 
H14 H 0.8198 0.1103 0.8646 0.027 Uiso 1 1 calc R . . 
C15 C 0.2575(3) 0.7666(3) 0.9318(3) 0.0202(8) Uani 1 1 d . . . 
C16 C 0.0669(3) 0.7283(3) 0.9215(3) 0.0203(8) Uani 1 1 d . . . 
C17 C 0.0968(3) 0.6281(3) 0.9358(3) 0.0263(9) Uani 1 1 d . . . 
H17 H 0.0421 0.5802 0.9353 0.032 Uiso 1 1 calc R . . 
C18 C 0.2035(3) 0.6028(3) 0.9498(3) 0.0272(9) Uani 1 1 d . . . 
H18 H 0.2257 0.5363 0.9622 0.033 Uiso 1 1 calc R . . 
C19 C 0.5610(3) 0.4138(3) 0.7684(3) 0.0238(9) Uani 1 1 d . . . 
C20 C 0.3584(3) 0.4290(3) 0.7248(3) 0.0208(8) Uani 1 1 d . . . 
C21 C 0.3450(3) 0.4396(3) 0.6245(3) 0.0258(9) Uani 1 1 d . . . 
H21 H 0.2725 0.4510 0.5756 0.031 Uiso 1 1 calc R . . 
C22 C 0.4375(3) 0.4328(3) 0.6012(3) 0.0281(9) Uani 1 1 d . . . 
H22 H 0.4298 0.4375 0.5342 0.034 Uiso 1 1 calc R . . 
H3 H 0.772(4) 0.636(4) 0.999(4) 0.079(17) Uiso 1 1 d . . . 
H1A H 0.509(3) 0.698(3) 0.558(3) 0.032(12) Uiso 1 1 d . . . 
H2A H 0.820(4) 0.427(3) 0.809(3) 0.044(13) Uiso 1 1 d . . . 
H3A H 0.358(3) 0.649(3) 0.962(3) 0.042(12) Uiso 1 1 d . . . 
H4A H 0.129(3) 0.862(3) 0.910(3) 0.050(14) Uiso 1 1 d . . . 
H5A H -0.046(4) 0.835(4) 0.906(3) 0.068(16) Uiso 1 1 d . . . 
H6A H 1.161(4) 0.085(4) 0.880(4) 0.09(2) Uiso 1 1 d . . . 
H6B H 0.601(4) 0.407(3) 0.654(3) 0.046(14) Uiso 1 1 d . . . 
H7A H 0.475(3) 0.409(3) 0.855(3) 0.022(11) Uiso 1 1 d . . . 
H8A H 0.288(4) 0.419(3) 0.828(4) 0.063(15) Uiso 1 1 d . . . 
H1B H 0.632(3) 0.702(3) 0.590(3) 0.031(11) Uiso 1 1 d . . . 
H2B H 0.923(3) 0.451(3) 0.782(3) 0.038(13) Uiso 1 1 d . . . 
H5B H -0.084(3) 0.723(3) 0.918(3) 0.034(12) Uiso 1 1 d . . . 
H8B H 0.203(4) 0.436(3) 0.711(3) 0.060(15) Uiso 1 1 d . . . 
N1 N 0.5688(3) 0.6731(3) 0.5992(3) 0.0271(8) Uani 1 1 d . . . 
N2 N 0.8958(3) 0.4165(3) 0.8186(3) 0.0284(8) Uani 1 1 d . . . 
N3 N 0.2817(3) 0.6705(2) 0.9467(2) 0.0242(8) Uani 1 1 d . . . 
N4 N 0.1474(2) 0.7923(2) 0.9178(2) 0.0195(7) Uani 1 1 d . . . 
N5 N -0.0328(3) 0.7627(3) 0.9115(2) 0.0227(8) Uani 1 1 d . . . 
N6 N 0.5425(3) 0.4195(2) 0.6699(2) 0.0258(8) Uani 1 1 d . . . 
N7 N 0.4648(3) 0.4160(2) 0.7908(2) 0.0211(7) Uani 1 1 d . . . 
N8 N 0.2744(3) 0.4320(2) 0.7568(3) 0.0251(8) Uani 1 1 d . . . 
O1 O 0.68918(19) 0.61655(19) 1.05570(18) 0.0242(6) Uani 1 1 d . . . 
O2 O 0.50220(19) 0.61464(17) 1.01112(18) 0.0220(6) Uani 1 1 d . . . 
O3 O 0.7872(2) 0.64752(19) 0.93709(19) 0.0258(7) Uani 1 1 d . . . 
O4 O 1.1091(2) -0.01171(19) 0.89493(19) 0.0276(7) Uani 1 1 d . . . 
O5 O 0.9335(2) -0.04223(18) 0.88785(18) 0.0245(6) Uani 1 1 d . . . 
O6 O 1.1667(2) 0.1602(2) 0.8669(2) 0.0287(7) Uani 1 1 d . . . 
O7 O 0.3293(2) 0.82792(18) 0.93317(19) 0.0250(6) Uani 1 1 d . . . 
O8 O 0.6558(2) 0.40755(19) 0.8307(2) 0.0286(7) Uani 1 1 d . . . 
 
loop_ 
 _atom_site_aniso_label 
 _atom_site_aniso_U_11 
 _atom_site_aniso_U_22 
 _atom_site_aniso_U_33 
 _atom_site_aniso_U_23 
 _atom_site_aniso_U_13 
 _atom_site_aniso_U_12 
C1 0.019(2) 0.017(2) 0.028(2) -0.0012(17) 0.0091(18) -0.0011(15) 
C2 0.0156(18) 0.0172(19) 0.021(2) 0.0004(16) 0.0062(16) 0.0018(15) 
C3 0.0172(19) 0.019(2) 0.022(2) 0.0047(16) 0.0046(17) 0.0004(15) 
C4 0.0169(19) 0.026(2) 0.025(2) -0.0011(17) 0.0099(17) -0.0037(16) 
C5 0.029(2) 0.0154(19) 0.020(2) 0.0022(16) 0.0083(17) 0.0012(16) 
C6 0.0154(19) 0.021(2) 0.027(2) 0.0013(17) 0.0047(17) 0.0022(15) 
C7 0.020(2) 0.021(2) 0.027(2) -0.0010(17) 0.0124(18) -0.0019(15) 
C8 0.0160(19) 0.031(2) 0.014(2) -0.0036(17) 0.0041(16) 0.0010(16) 
C9 0.0210(19) 0.025(2) 0.0120(19) -0.0058(16) 0.0052(16) -0.0036(16) 
C10 0.020(2) 0.030(2) 0.017(2) -0.0028(17) 0.0068(17) -0.0014(17) 
C11 0.022(2) 0.029(2) 0.020(2) 0.0001(17) 0.0093(17) -0.0056(17) 
C12 0.023(2) 0.027(2) 0.013(2) 0.0034(17) 0.0050(17) 0.0045(17) 
C13 0.0153(19) 0.029(2) 0.025(2) 0.0016(18) 0.0072(17) 0.0023(16) 
C14 0.019(2) 0.027(2) 0.022(2) -0.0020(17) 0.0077(17) -0.0022(16) 
C15 0.0150(19) 0.033(2) 0.014(2) -0.0011(17) 0.0071(15) 0.0016(17) 
C16 0.019(2) 0.025(2) 0.016(2) 0.0003(17) 0.0061(16) 0.0014(16) 
C17 0.024(2) 0.028(2) 0.026(2) 0.0030(18) 0.0083(18) -0.0010(17) 
C18 0.025(2) 0.029(2) 0.029(2) 0.0030(19) 0.0116(18) 0.0012(18) 
C19 0.026(2) 0.019(2) 0.030(2) 0.0024(18) 0.0148(19) 0.0020(17) 
C20 0.020(2) 0.017(2) 0.025(2) 0.0014(17) 0.0083(17) 0.0023(16) 
C21 0.025(2) 0.032(2) 0.020(2) 0.0011(18) 0.0081(18) -0.0019(17) 
C22 0.034(2) 0.030(2) 0.020(2) -0.0026(18) 0.0082(19) -0.0034(19) 
N1 0.024(2) 0.032(2) 0.024(2) 0.0057(16) 0.0072(17) 0.0000(16) 
N2 0.0235(19) 0.031(2) 0.033(2) 0.0093(17) 0.0135(17) 0.0025(16) 
N3 0.0181(18) 0.0287(19) 0.027(2) 0.0086(16) 0.0096(15) 0.0061(15) 
N4 0.0139(16) 0.0240(18) 0.0193(18) 0.0051(15) 0.0045(13) 0.0023(13) 
N5 0.0153(17) 0.028(2) 0.0241(19) -0.0016(16) 0.0066(15) -0.0038(15) 
N6 0.0223(19) 0.030(2) 0.031(2) 0.0009(16) 0.0163(16) 0.0039(15) 
N7 0.0196(17) 0.0244(18) 0.0220(19) 0.0036(15) 0.0109(15) 0.0026(13) 
N8 0.0158(18) 0.036(2) 0.023(2) 0.0017(16) 0.0064(16) 0.0019(15) 
O1 0.0145(13) 0.0378(17) 0.0202(15) 0.0025(12) 0.0062(11) 0.0006(11) 
O2 0.0156(13) 0.0274(15) 0.0251(15) 0.0034(12) 0.0099(12) 0.0018(11) 
O3 0.0138(13) 0.0429(18) 0.0185(15) 0.0026(13) 0.0030(12) -0.0014(12) 
O4 0.0187(14) 0.0288(16) 0.0348(17) -0.0002(13) 0.0090(12) 0.0047(12) 
O5 0.0161(13) 0.0246(15) 0.0293(16) -0.0009(12) 0.0036(12) -0.0013(11) 
O6 0.0167(14) 0.0348(18) 0.0387(18) 0.0020(14) 0.0148(13) 0.0015(12) 
O7 0.0167(13) 0.0319(15) 0.0277(16) 0.0025(13) 0.0094(12) -0.0031(12) 
O8 0.0169(14) 0.0326(17) 0.0348(17) 0.0035(13) 0.0073(13) 0.0039(12) 
 
_geom_special_details 
; 
 All esds (except the esd in the dihedral angle between two l.s. planes) 
 are estimated using the full covariance matrix.  The cell esds are taken 
 into account individually in the estimation of esds in distances, angles 
 and torsion angles; correlations between esds in cell parameters are only 
 used when they are defined by crystal symmetry.  An approximate (isotropic) 
 treatment of cell esds is used for estimating esds involving l.s. planes. 
; 
 
loop_ 
 _geom_bond_atom_site_label_1 
 _geom_bond_atom_site_label_2 
 _geom_bond_distance 
 _geom_bond_site_symmetry_2 
 _geom_bond_publ_flag 
C1 O2 1.256(4) . ? 
C1 O1 1.280(4) . ? 
C1 C2 1.470(5) . ? 
C2 C7 1.398(5) . ? 
C2 C3 1.407(5) . ? 
C3 O3 1.363(4) . ? 
C3 C4 1.372(5) . ? 
C4 C5 1.386(5) . ? 
C5 N1 1.390(5) . ? 
C5 C6 1.397(5) . ? 
C6 C7 1.362(5) . ? 
C8 O5 1.254(4) . ? 
C8 O4 1.283(4) . ? 
C8 C9 1.469(5) . ? 
C9 C14 1.387(5) . ? 
C9 C10 1.406(5) . ? 
C10 O6 1.362(4) . ? 
C10 C11 1.377(5) . ? 
C11 C12 1.390(5) . ? 
C12 N2 1.384(5) . ? 
C12 C13 1.391(5) . ? 
C13 C14 1.369(5) . ? 
C15 O7 1.230(4) . ? 
C15 N3 1.351(5) . ? 
C15 N4 1.374(4) . ? 
C16 N5 1.301(4) . ? 
C16 N4 1.358(4) . ? 
C16 C17 1.418(5) . ? 
C17 C18 1.332(5) . ? 
C18 N3 1.365(5) . ? 
C19 O8 1.218(4) . ? 
C19 N7 1.365(4) . ? 
C19 N6 1.374(5) . ? 
C20 N8 1.302(4) . ? 
C20 N7 1.354(4) . ? 
C20 C21 1.420(5) . ? 
C21 C22 1.329(5) . ? 
C22 N6 1.356(5) . ? 
 
loop_ 
 _geom_angle_atom_site_label_1 
 _geom_angle_atom_site_label_2 
 _geom_angle_atom_site_label_3 
 _geom_angle 
 _geom_angle_site_symmetry_1 
 _geom_angle_site_symmetry_3 
 _geom_angle_publ_flag 
O2 C1 O1 121.2(3) . . ? 
O2 C1 C2 121.6(3) . . ? 
O1 C1 C2 117.2(3) . . ? 
C7 C2 C3 116.8(3) . . ? 
C7 C2 C1 122.2(3) . . ? 
C3 C2 C1 121.0(3) . . ? 
O3 C3 C4 117.1(3) . . ? 
O3 C3 C2 121.3(3) . . ? 
C4 C3 C2 121.6(3) . . ? 
C3 C4 C5 119.9(3) . . ? 
C4 C5 N1 119.0(3) . . ? 
C4 C5 C6 119.7(4) . . ? 
N1 C5 C6 121.3(4) . . ? 
C7 C6 C5 119.7(3) . . ? 
C6 C7 C2 122.3(3) . . ? 
O5 C8 O4 122.0(3) . . ? 
O5 C8 C9 119.8(3) . . ? 
O4 C8 C9 118.2(3) . . ? 
C14 C9 C10 117.6(3) . . ? 
C14 C9 C8 120.3(3) . . ? 
C10 C9 C8 122.1(3) . . ? 
O6 C10 C11 118.8(3) . . ? 
O6 C10 C9 120.5(3) . . ? 
C11 C10 C9 120.7(3) . . ? 
C10 C11 C12 120.6(3) . . ? 
N2 C12 C11 121.0(4) . . ? 
N2 C12 C13 120.0(3) . . ? 
C11 C12 C13 118.9(3) . . ? 
C14 C13 C12 120.2(3) . . ? 
C13 C14 C9 122.0(3) . . ? 
O7 C15 N3 122.7(3) . . ? 
O7 C15 N4 121.7(3) . . ? 
N3 C15 N4 115.6(3) . . ? 
N5 C16 N4 117.9(3) . . ? 
N5 C16 C17 124.3(4) . . ? 
N4 C16 C17 117.8(3) . . ? 
C18 C17 C16 118.4(4) . . ? 
C17 C18 N3 121.3(4) . . ? 
O8 C19 N7 122.7(4) . . ? 
O8 C19 N6 122.6(3) . . ? 
N7 C19 N6 114.7(4) . . ? 
N8 C20 N7 118.3(4) . . ? 
N8 C20 C21 123.8(4) . . ? 
N7 C20 C21 117.9(3) . . ? 
C22 C21 C20 117.7(4) . . ? 
C21 C22 N6 122.3(4) . . ? 
C15 N3 C18 122.9(3) . . ? 
C16 N4 C15 123.9(3) . . ? 
C22 N6 C19 122.4(3) . . ? 
C20 N7 C19 124.8(3) . . ? 
 
_diffrn_measured_fraction_theta_max    0.999 
_diffrn_reflns_theta_full              26.10 
_diffrn_measured_fraction_theta_full   0.999 
_refine_diff_density_max    0.341 
_refine_diff_density_min   -0.277 
_refine_diff_density_rms    0.066 
